# Supplementary material for: Characterization of ceRNA network to reveal potential prognostic biomarkers in triple-negative breast cancer
Source: PeerJ journal article supplement (doi:10.7717/peerj.7522), 2019-09-09

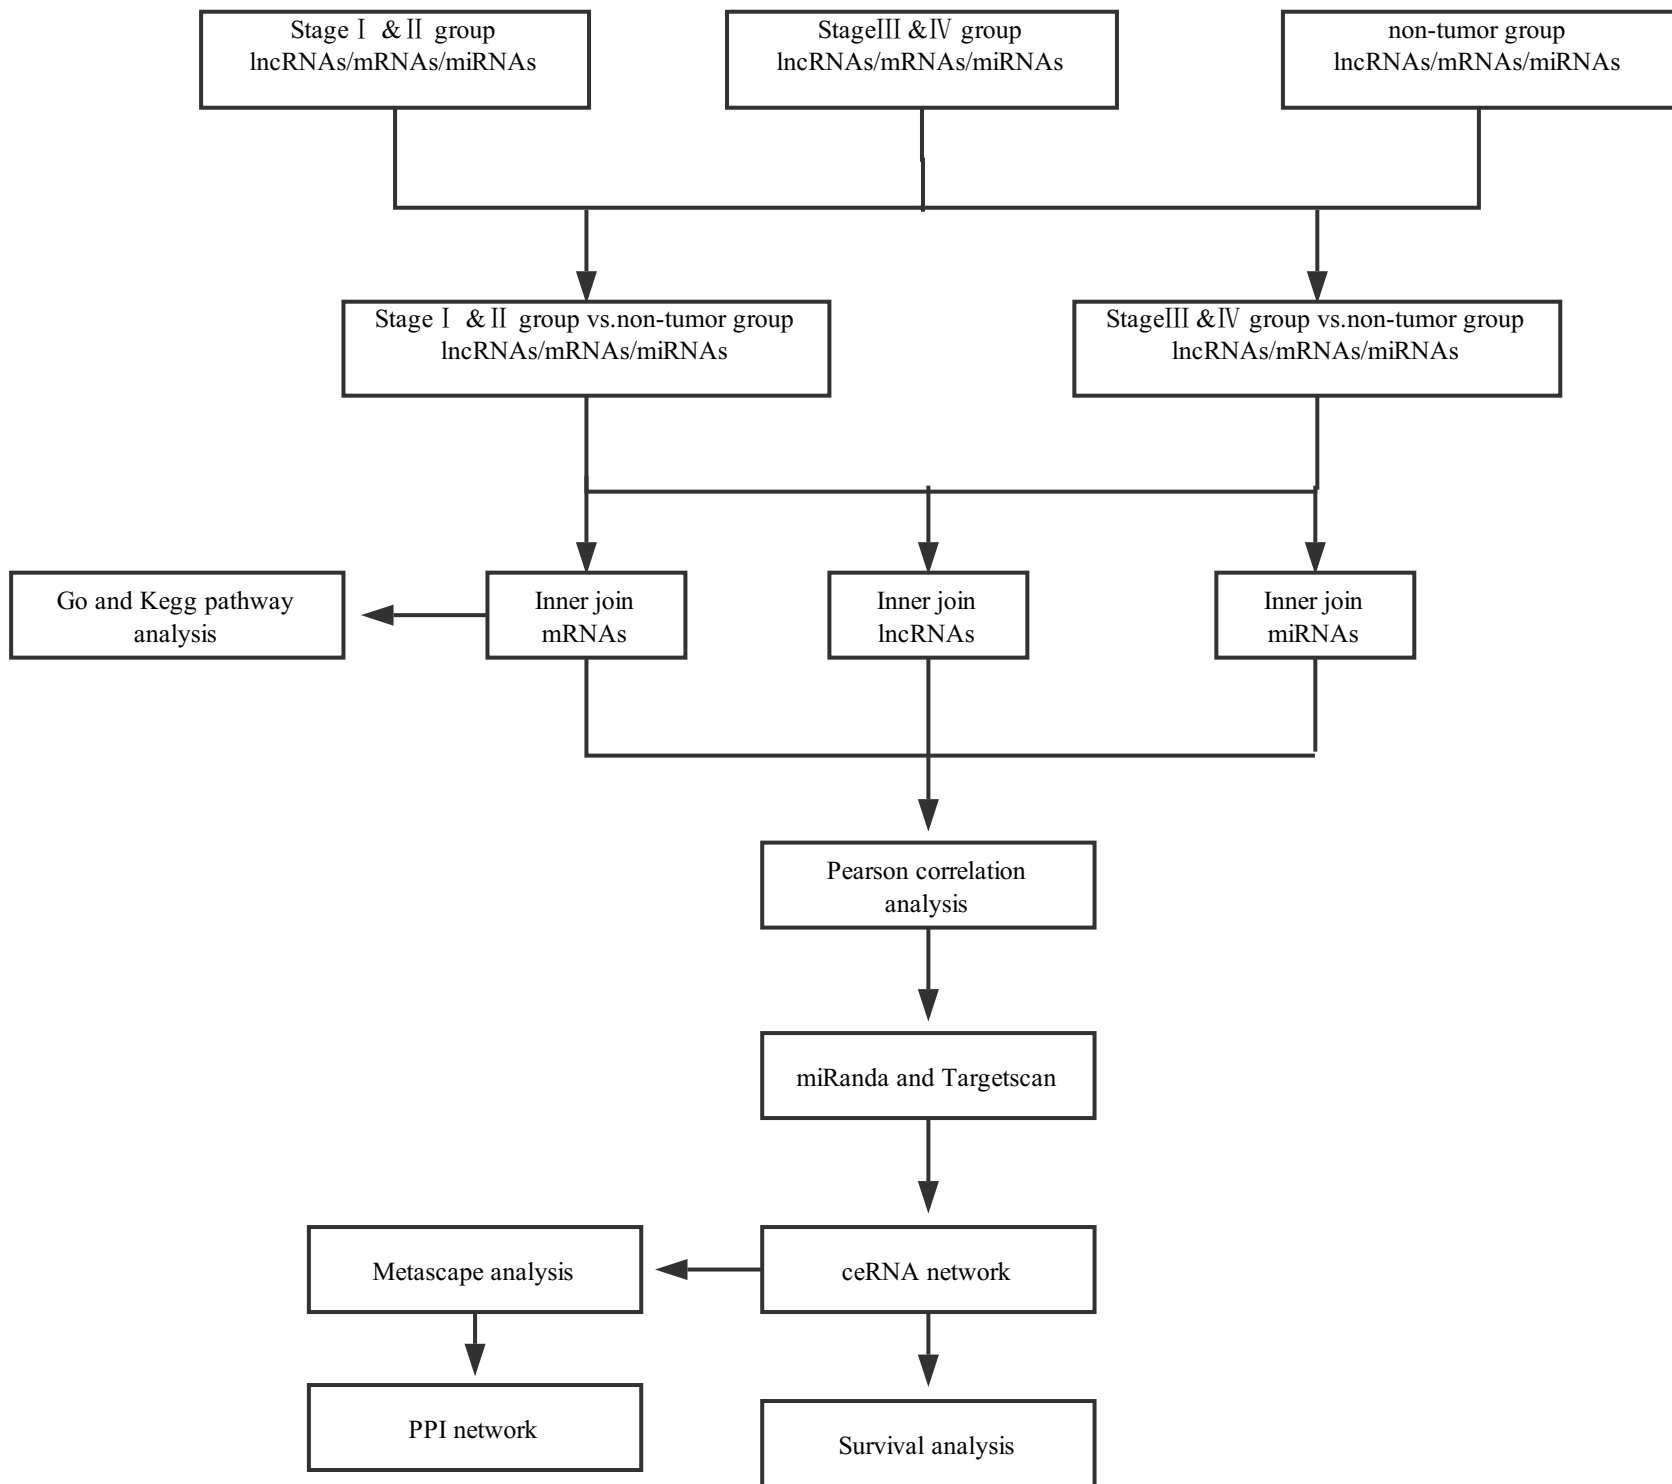

Supplement: Figure_S1.pdf [file Figure_S1.pdf]
