# Supplementary material for: Characterization of ceRNA network to reveal potential prognostic biomarkers in triple-negative breast cancer
Source: PeerJ journal article supplement (doi:10.7717/peerj.7522), 2019-09-09

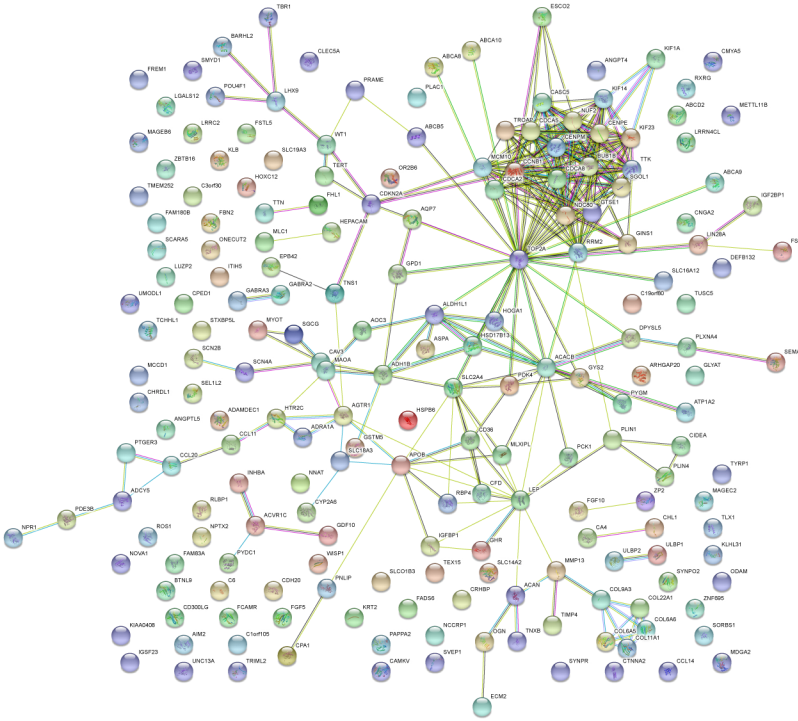

Supplement: FigureS2.pdf [file FigureS2.pdf]
